# Supplementary material for: Multicriteria global optimization for biocircuit design
Source: PubMed Central journal article supplement (PMC4180256; doi:10.1186/s12918-014-0113-3), 2014-09-24
Supplement: 12918_2014_113_MOESM1_ESM.pdf [file 12918_2014_113_MOESM1_ESM.pdf]

## Additional File 1.

### Multicriteria global optimization for biocircuit design

Irene Otero-Muras and Julio R. Banga

Bioprocess Engineering Group, Spanish Council for Scientific Research, IIM-CSIC, Eduardo Cabello 6, 36208 Vigo (Spain)

---

This additional file contains the generic equations for the model of the genetic circuit used as a working example through the main text. The dynamic model equations and the kinetic parameters have been obtained from Ref. [1].

#### Model Equations and Parameters

The states of the generic model are the concentrations of all the species involved  $lacI$ ,  $LacIIP TG$ ,  $tetR$ ,  $tetRaTc$ ,  $cI$ ,  $araC$  and the generic model consists of 6 ordinary differential equations representing the mass balances for the system. The coefficients  $Y(i, j)$  for  $i = 1, \dots, 8$  and  $j = 1, \dots, 4$  are binary variables that take value 1 if the corresponding pair is active and 0 if it is inactive for a given circuit.

$$\begin{aligned} dlacI &= +Y(1, 2)\alpha_{lac}/(1 + K_{lac1}lacI^4) \\ &+ Y(2, 2)\alpha_{lac}/(1 + K_{lac2}lacI^4) \\ &+ Y(3, 2)\alpha_{lac}/(1 + K_{lac3}lacI^4) \\ &+ Y(4, 2)\alpha_{lac}/(1 + K_{lac4}lacI^4) \\ &+ Y(5, 2)\alpha_{\lambda}/(1 + K_{lambda}cI^2) \\ &+ Y(6, 2)\alpha_{tet}/(1 + K_{tet1}tetR^2) \\ &+ Y(7, 2)\alpha_{tet}/(1 + K_{tet2}tetR^2) \\ &+ Y(8, 2)\alpha_{ara}/(1 + K_{araC}araC^2) \\ &- Kf \cdot lacI \cdot IPTG \\ &+ Kb \cdot lacIIP TG \\ &- K_{deglacI} \cdot lacI \\ dlacIIP TG &= +Kf \cdot lacI \cdot IPTG \\ &- Kb \cdot lacIIP TG \\ &- K_{degcpx} \cdot lacIIP TG \\ dtetR &= +Y(1, 1)\alpha_{lac}/(1 + K_{lac1}lacI^4) \\ &+ Y(2, 1)\alpha_{lac}/(1 + K_{lac2}lacI^4) \\ &+ Y(3, 1)\alpha_{lac}/(1 + K_{lac3}lacI^4) \\ &+ Y(4, 1)\alpha_{lac}/(1 + K_{lac4}lacI^4) \\ &+ Y(5, 1)\alpha_{\lambda}/(1 + K_{lambda} \cdot cI^2) \\ &+ Y(6, 1)\alpha_{tet}/(1 + K_{tet1}tetR^2) \\ &+ Y(7, 1)\alpha_{tet}/(1 + K_{tet2}tetR^2) \end{aligned}$$

$$\begin{aligned}
& + Y(8, 1)\alpha_{tet}/(1 + K_{araC}araC^2) \\
& - K_{ftetR} \cdot aTc \\
& + K_b \text{ tetRaTc} \\
& - K_{degtetR} \text{ tetR} \\
dtetRaTc = & + K_f \cdot tetR \cdot aTc \\
& - K_b \cdot tetRaTc \\
& - K_{degcpx} \cdot tetRaTc \\
dcI = & + Y(1, 3)\alpha_{lac}/(1 + K_{lac1}lacI^4) \\
& + Y(2, 3)\alpha_{lac}/(1 + K_{lac2}lacI^4) \\
& + Y(3, 3)\alpha_{lac}/(1 + K_{lac3}lacI^4) \\
& + Y(4, 3)\alpha_{lac}/(1 + K_{lac4}lacI^4) \\
& + Y(5, 3)\alpha_{\lambda}/(1 + K_{lambda} \cdot cI^2) \\
& + Y(6, 3)\alpha_{tet}/(1 + K_{tet1}tetR^2) \\
& + Y(7, 3)\alpha_{tet}/(1 + K_{tet2}tetR^2) \\
& + Y(8, 3)\alpha_{tet}/(1 + K_{araC}araC^2) \\
& - K_{degcI}cI \\
daraC = & + Y(1, 4)\alpha_{lac}/(1 + K_{lac1}lacI^4) \\
& + Y(2, 4)\alpha_{lac}/(1 + K_{lac2}lacI^4) \\
& + Y(3, 4)\alpha_{lac}/(1 + K_{lac3}lacI^4) \\
& + Y(4, 4)\alpha_{lac}/(1 + K_{lac4}lacI^4) \\
& + Y(5, 4)\alpha_{\lambda}/(1 + K_{lambda} \cdot cI^2) \\
& + Y(6, 4)\alpha_{tet}/(1 + K_{tet1}tetR^2) \\
& + Y(7, 4)\alpha_{tet}/(1 + K_{tet2}tetR^2) \\
& + Y(8, 4)\alpha_{tet}/(1 + K_{araC}araC^2) \\
& - K_{degaraC}araC.
\end{aligned}$$

The values of the parameters are included in the following Table S1.

Table S1 Parameters from Dasika and Maranas [1]

| Parameter          | value   | units           |
|--------------------|---------|-----------------|
| $\alpha_{lac}$     | 1.215   |                 |
| $\alpha_{tet}$     | 1.215   |                 |
| $\alpha_{\lambda}$ | 2.92    |                 |
| $\alpha_{ara}$     | 1.215   |                 |
| $K_{\lambda}$      | 0.33    | $nm^{-2}$       |
| $K_{tet1}$         | 0.014   | $nm^{-2}$       |
| $K_{tet2}$         | 1.4     | $nm^{-2}$       |
| $K_{lac1}$         | 10      | $nm^{-2}$       |
| $K_{lac2}$         | 0.01    | $nm^{-2}$       |
| $K_{lac3}$         | 0.001   | $nm^{-2}$       |
| $K_{lac4}$         | 0.00001 | $nm^{-2}$       |
| $K_{araC}$         | 2.5     | $nm^{-2}$       |
| $K_{deglacI}$      | 0.0346  | $s^{-1}$        |
| $K_{degtetR}$      | 0.0346  | $s^{-1}$        |
| $K_{degcI}$        | 0.0693  | $s^{-1}$        |
| $K_{degarac}$      | 0.0115  | $s^{-1}$        |
| $K_{degcp\bar{x}}$ | 0.0693  | $s^{-1}$        |
| $K_f$              | 0.05    | $nm^{-1}s^{-1}$ |
| $K_b$              | 0.1     | $s^{-1}$        |

## References

- [1] Dasika, M.S., Maranas, C.D.: Optcircuit: An optimization based method for computational design of genetic circuits. BMC Syst Biol 2, 24 (2008)
