# Supplementary material for: Multicriteria global optimization for biocircuit design
Source: PubMed Central journal article supplement (PMC4180256; doi:10.1186/s12918-014-0113-3), 2014-09-24
Supplement: 12918_2014_113_MOESM2_ESM.pdf [file 12918_2014_113_MOESM2_ESM.pdf]

## Additional File 2.

### Multicriteria global optimization for biocircuit design

*Irene Otero-Muras and Julio R. Banga*

Bioprocess Engineering Group, Spanish Council for Scientific Research, IIM-CSIC, Eduardo Cabello 6, 36208 Vigo (Spain)

This additional file contains five supplementary figures not included in the main text for space reasons.

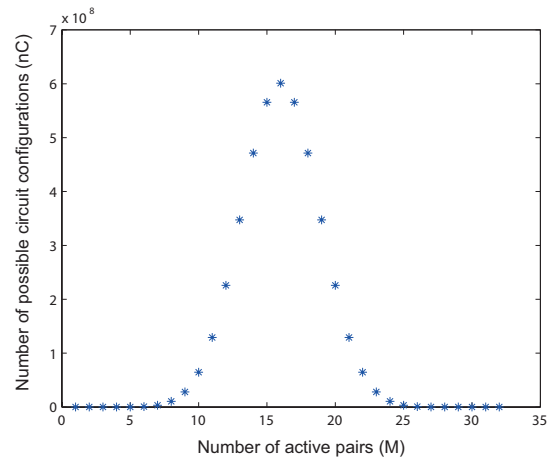

**Figure S1** Number of possible circuit configurations as a function of the number of active pairs (for a library with  $p = 32$  possible pairs).

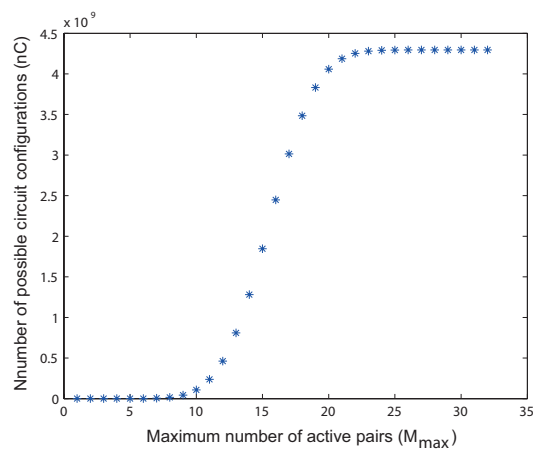

**Figure S2** Number of possible circuit configurations for increasing  $M_{max}$  (for a library with  $p = 32$  possible pairs).

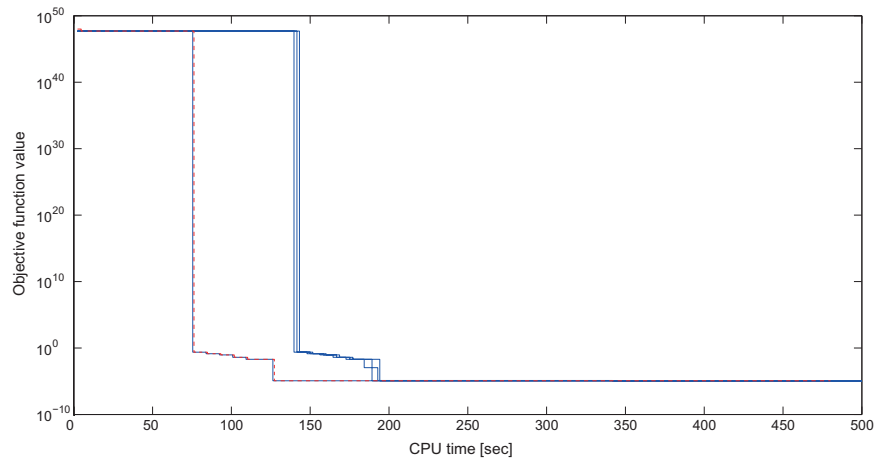

**Figure S3** MITS Convergence curves for different initial guesses with  $M_{max} = 2$ . The initial guess for the red dashed convergence curve is the circuit with no active pairs. To make possible a log scale representation the objective function has been shifted to the positive orthant. Results obtained with Matlab under Windows 7 in a PC Intel 2.8 GHz Xeon.

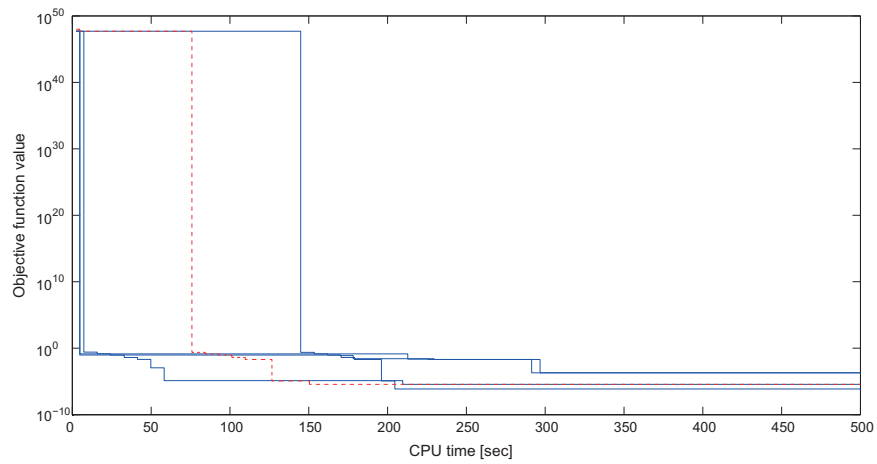

**Figure S4** MITS Convergence curves for different initial guesses with  $M_{max} = 3$ . The initial guess for the red dashed convergence curve is the circuit with no active pairs. To make possible a log scale representation the objective function has been shifted to the positive orthant. Results obtained with Matlab under Windows 7 in a PC Intel 2.8 GHz Xeon.

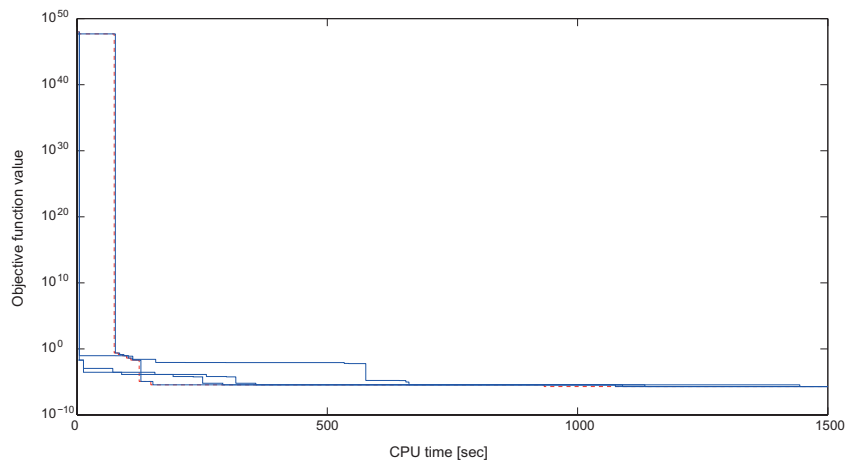

**Figure S5** MITS Convergence curves for different initial guesses with  $M_{max} = 32$ . The initial guess for the red dashed convergence curve is the circuit with no active pairs. To make possible a log scale representation the objective function has been shifted to the positive orthant. Results obtained with Matlab under Windows 7 in a PC Intel 2.8 GHz Xeon.
